# Supplementary material
Source: Springer Nature journal article supplement (https://www.springermedizin.de/resource/supplementary/12958_2014_1247_MOESM5_ESM.pdf/9567140)

**a**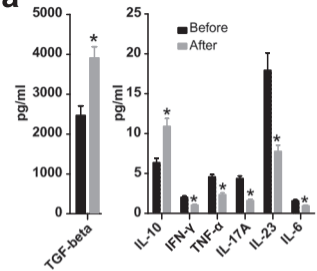**b**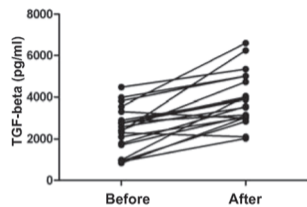**c**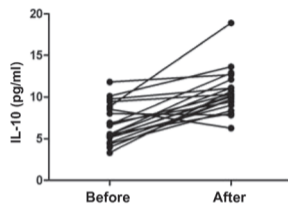**d**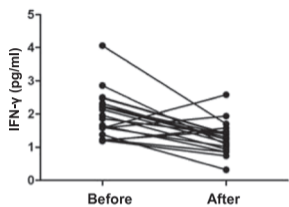**e**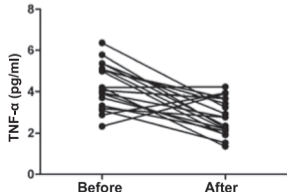**f**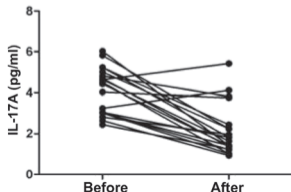**g**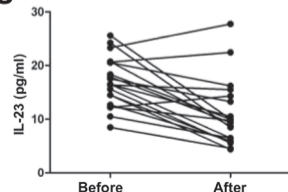**h**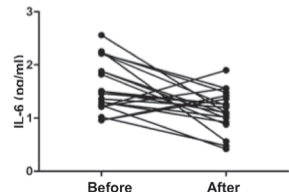

Supplement: MOESM5 [file 9567140]
